# Supplementary material
Source: bioRxiv or medRxiv preprint supplement (http://medrxiv.org/highwire/filestream/88221/field_highwire_adjunct_files/0/2020.07.01.20144329-1.pdf)

## Supplementary Material

### Low plasma vitamin D level is associated with increased risk of COVID-19 infection: an Israeli population-based study

Eugene Merzon<sup>1,2\*</sup>, Dmitry Tworowski<sup>3</sup>, Alessandro Gorohovski<sup>3</sup>, Shlomo Vinker<sup>1,2</sup>, Avivit Golan Cohen<sup>1,2</sup>, Ilan Green<sup>1,2</sup>, Milana Frenkel Morgenstern<sup>3\*</sup>

<sup>1</sup> Leumit Health Services, Tel-Aviv, Israel;

<sup>2</sup> Department of Family Medicine, Sackler School of Medicine, Tel Aviv University, Tel Aviv, Israel;

<sup>3</sup> Cancer Genomics and BioComputing of Complex Diseases Lab, Azrieli Faculty of Medicine, Bar-Ilan University, Israel.

\*Correspondence:

Dr. Eugene Merzon, [emarzon@leumit.co.il](mailto:emarzon@leumit.co.il) and Dr. Milana Frenkel-Morgenstern [milana.morgenstern@biu.ac.il](mailto:milana.morgenstern@biu.ac.il)

**Figure S1. The prevalence of vitamin D<sub>3</sub> deficiency, age, sex, BMI, and current smoking status among persons who tested negative for COVID-19 (A) and positive for COVID-19 (B).**

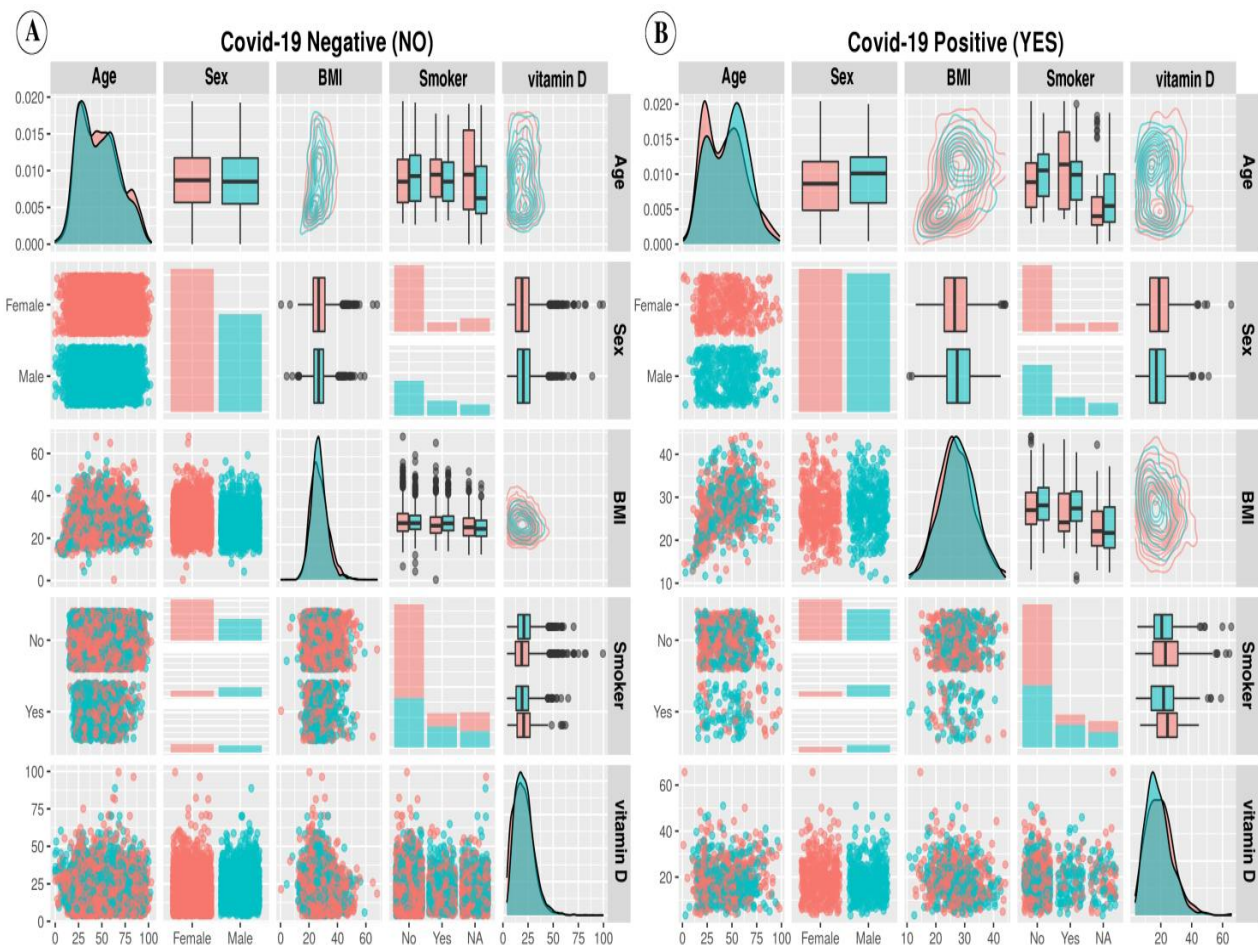

Supplement: Supplementary file [file 2020.07.01.20144329-1.pdf]
